# Supplementary material
Source: publisher site journal article supplement (https://www.dovepress.com/article/346930)
Supplement: Supplementary file 1 [file get_supplementary_file.php]

## Supplementary materials

**Table S1: CHERRIES Checklist**

| <b>Item Category</b>                                 | <b>Checklist item</b> | <b>Page no.</b> | <b>Description</b>                                                                                                          |
|------------------------------------------------------|-----------------------|-----------------|-----------------------------------------------------------------------------------------------------------------------------|
| <b>Target Population</b>                             | Study Design          | 5               | Study Population are adult above 18 of both genders                                                                         |
|                                                      |                       |                 |                                                                                                                             |
| <b>Ethics</b>                                        | Study Design          | 5               | Ethics was obtained from the Abu Dhabi University Institutional Review Board on 16 May 2020 (CHS-20-05-00014).              |
|                                                      | Consent Form          | 5               | All participants were prompted to accept participation before starting the survey                                           |
|                                                      | Data Protection       | 5               | Privacy and confidentiality were affirmed in the first page of the survey                                                   |
| <b>Development and pre-testing</b>                   | Data collection       | 6               | Questionnaire was developed and reviewed by research team and then piloted before distribution                              |
| <b>Recruitment Process and survey administration</b> | Data Collection       | 5 & 6           | The link was distributed via email and social media platforms. Participants were prompted to share the link. Reminders were |

|                                                         |                                        |     |                                                                                                                                                                                                                                                                                                    |
|---------------------------------------------------------|----------------------------------------|-----|----------------------------------------------------------------------------------------------------------------------------------------------------------------------------------------------------------------------------------------------------------------------------------------------------|
|                                                         |                                        |     | sent by researchers at different occasions                                                                                                                                                                                                                                                         |
| <b>Responses rate</b>                                   | Results                                | 7   | Out of 999 questionnaires started only 6 surveys were not completed. Total completed surveys is 993                                                                                                                                                                                                |
| <b>Preventing multiple entries from same individual</b> | Data collection                        | 6   | To prevent multiple entries we have used the option available on survey monkey to not allow the same IP address to fill in the questionnaire,                                                                                                                                                      |
| <b>Analysis</b>                                         | Statistical analysis and data handling | 6&7 | Only completed questionnaires were completed in the data set. The minimum completed survey was timed at approximately 7 minutes<br>Sources of information and frequency of use, social media use and frequency as well as wellbeing scores were calculated<br>Regression analysis was also applied |

**Notes:** Adapted from: Eysenbach G. Improving the quality of Web surveys: the Checklist for Reporting Results of Internet E-Surveys (CHERRIES). *J Med Internet Res.* 2004;6(3):e34. doi: 10.2196/jmir.6.3.e34. PMID: 15471760. PMCID: PMC1550605. Available from: <https://www.jmir.org/2004/3/e34/>. © Gunther Eysenbach. Originally published in the Journal of Medical Internet Research (<http://www.jmir.org>), 29.9.2004. Creative Commons Attribution License (<http://www.creativecommons.org/licenses/by/2.0/>).

**Table S2. WHO (Five) Well-being Questionnaire Score - 5 questions**

|                                                            | All of the time | Most of the time | More than half of the time | Less than half of the time | Some of the time | At no time |
|------------------------------------------------------------|-----------------|------------------|----------------------------|----------------------------|------------------|------------|
| I have felt cheerful and in good spirits                   | 63 (6.4)        | 238 (24.3)       | 288 (29.4)                 | 209 (21.3)                 | 146 (14.9)       | 35 (3.6)   |
| I have felt calm and relaxed                               | 78 (7.9)        | 239 (24.4)       | 247 (25.2)                 | 203 (20.7)                 | 164 (16.7)       | 50 (5.1)   |
| I have felt active and vigorous                            | 46 (4.7)        | 159 (16.4)       | 218 (22.5)                 | 260 (26.8)                 | 211 (21.7)       | 77 (7.9)   |
| I woke up feeling fresh and rested                         | 76 (7.8)        | 184 (18.9)       | 203 (20.8)                 | 221 (22.7)                 | 194 (19.9)       | 96 (9.9)   |
| My daily life has been filled with things that interest me | 108 (11.0)      | 200 (20.4)       | 221 (22.5)                 | 183 (18.7)                 | 195 (19.9)       | 74 (7.5)   |

**Notes:** Adapted with permission from: WHO. Wellbeing Measures in Primary Health Care/The Depcare Project; 1998. Available from: [https://www.euro.who.int/\\_\\_data/assets/pdf\\_file/0016/130750/E60246.pdf](https://www.euro.who.int/__data/assets/pdf_file/0016/130750/E60246.pdf). © Copyright WHO 1998.

**Table S3. WHO-5 Well-being Index Score**

| <b>Variable</b> | <b>All</b> | <b>Well-being score</b>          | <b>Good well-being (<math>\geq 12.5</math>)</b> | <b>Poor well-being (<math>&lt; 12.5</math>)</b> |
|-----------------|------------|----------------------------------|-------------------------------------------------|-------------------------------------------------|
| <b>Overall</b>  | <b>993</b> | <b>12.6 <math>\pm</math> 5.6</b> | <b>511 (51.5)</b>                               | <b>481 (48.5)</b>                               |
